# Supplementary material for: The role of HIF-1 in oncostatin M-dependent metabolic reprogramming of hepatic cells
Source: PubMed Central journal article supplement (PMC4756539; doi:10.1186/s40170-016-0141-0), 2016-02-17
Supplement: 40170_2016_141_MOESM1_ESM.pdf [file 40170_2016_141_MOESM1_ESM.pdf]

## Additional file 1: Table S1

| Compound                   | Ions    | Exact ion | dwell time (ms) | Sum formula                                                                   | RT (min) |
|----------------------------|---------|-----------|-----------------|-------------------------------------------------------------------------------|----------|
| Pyruvic acid 1MeOX 1TBDMS  | 174–180 | 0         | 15              | C <sub>6</sub> H <sub>12</sub> O <sub>3</sub> NSi                             | 6.62     |
| Lactic acid 2TBDMS         | 261–267 | 0.1       | 15              | C <sub>11</sub> H <sub>25</sub> O <sub>3</sub> Si <sub>2</sub>                | 8.35     |
| Alanine 2TBDMS             | 260–266 | 0.1       | 15              | C <sub>11</sub> H <sub>26</sub> NO <sub>2</sub> Si <sub>2</sub>               | 8.89     |
| Glycine 2TBDMS             | 246–252 | 0.1       | 15              | C <sub>10</sub> H <sub>24</sub> NO <sub>2</sub> Si <sub>2</sub>               | 9.4      |
| γ-Aminobutyric acid 2TBDMS | 274–281 | 0.2       | 15              | C <sub>12</sub> H <sub>28</sub> NO <sub>2</sub> Si <sub>2</sub>               | 11.74    |
| Succinic acid 2TBDMS       | 289–296 | 0.1       | 15              | C <sub>12</sub> H <sub>25</sub> O <sub>4</sub> Si <sub>2</sub>                | 12.04    |
| Fumaric acid 2TBDMS        | 287–294 | 0.1       | 15              | C <sub>12</sub> H <sub>23</sub> O <sub>4</sub> Si <sub>2</sub>                | 12.18    |
| Serine 2TBDMS              | 390–396 | 0.2       | 15              | C <sub>17</sub> H <sub>40</sub> NO <sub>3</sub> Si <sub>3</sub>               | 13.54    |
| Methionine 2TBDMS          | 320–328 | 0.2       | 10              | C <sub>13</sub> H <sub>30</sub> NO <sub>2</sub> SSi <sub>2</sub>              | 14.17    |
| 2-Oxoglutaric 1MeOX 2TBDMS | 346–354 | 0.2       | 10              | C <sub>14</sub> H <sub>28</sub> NO <sub>5</sub> Si <sub>2</sub>               | 14.86    |
| Malic acid 3TBDMS          | 419–426 | 0.2       | 15              | C <sub>18</sub> H <sub>39</sub> O <sub>5</sub> Si <sub>3</sub>                | 15.06    |
| Aspartic acid 3TBDMS       | 418–425 | 0.2       | 15              | C <sub>18</sub> H <sub>40</sub> NO <sub>4</sub> Si <sub>3</sub>               | 15.48    |
| Glutamic acid 3TBDMS       | 432–440 | 0.3       | 10              | C <sub>19</sub> H <sub>42</sub> NO <sub>4</sub> Si <sub>3</sub>               | 16.56    |
| Glutamine 3TBDMS           | 431–439 | 0.3       | 10              | C <sub>19</sub> H <sub>43</sub> N <sub>2</sub> O <sub>3</sub> Si <sub>3</sub> | 18.22    |
| Citric acid 4TBDMS         | 591–600 | 0.3       | 10              | C <sub>26</sub> H <sub>55</sub> O <sub>7</sub> Si <sub>4</sub>                | 19.17    |
