# Supplementary material for: The role of HIF-1 in oncostatin M-dependent metabolic reprogramming of hepatic cells
Source: PubMed Central journal article supplement (PMC4756539; doi:10.1186/s40170-016-0141-0), 2016-02-17

# Additional file 2: Figure S1.

**A**

OSM compared to normoxia

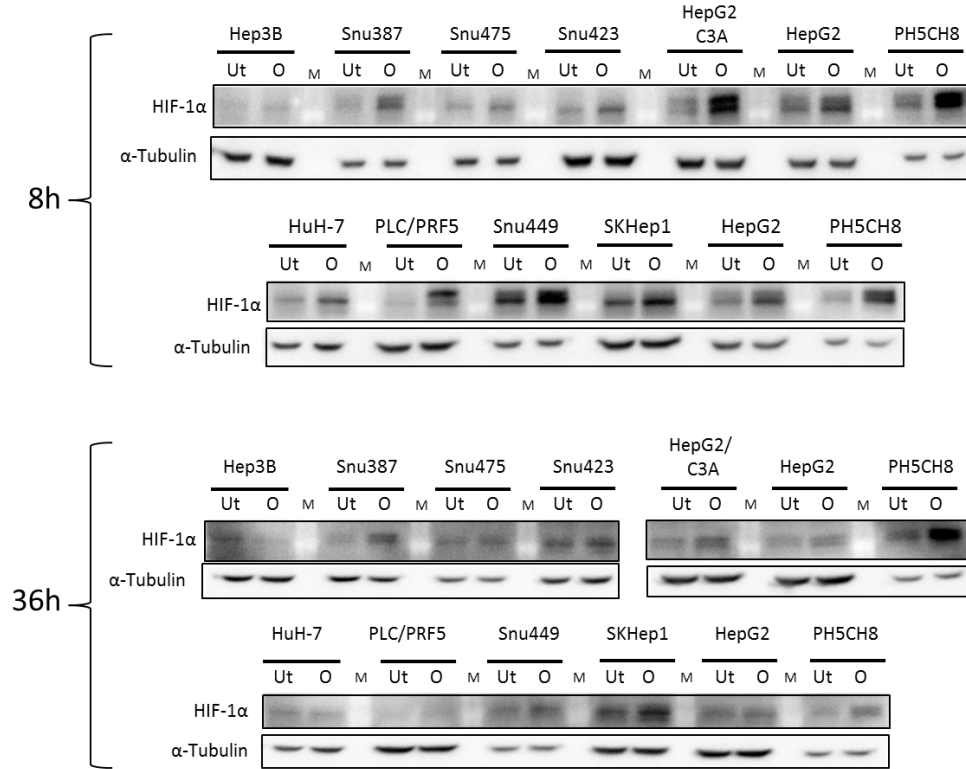

**B**

OSM compared to hypoxia

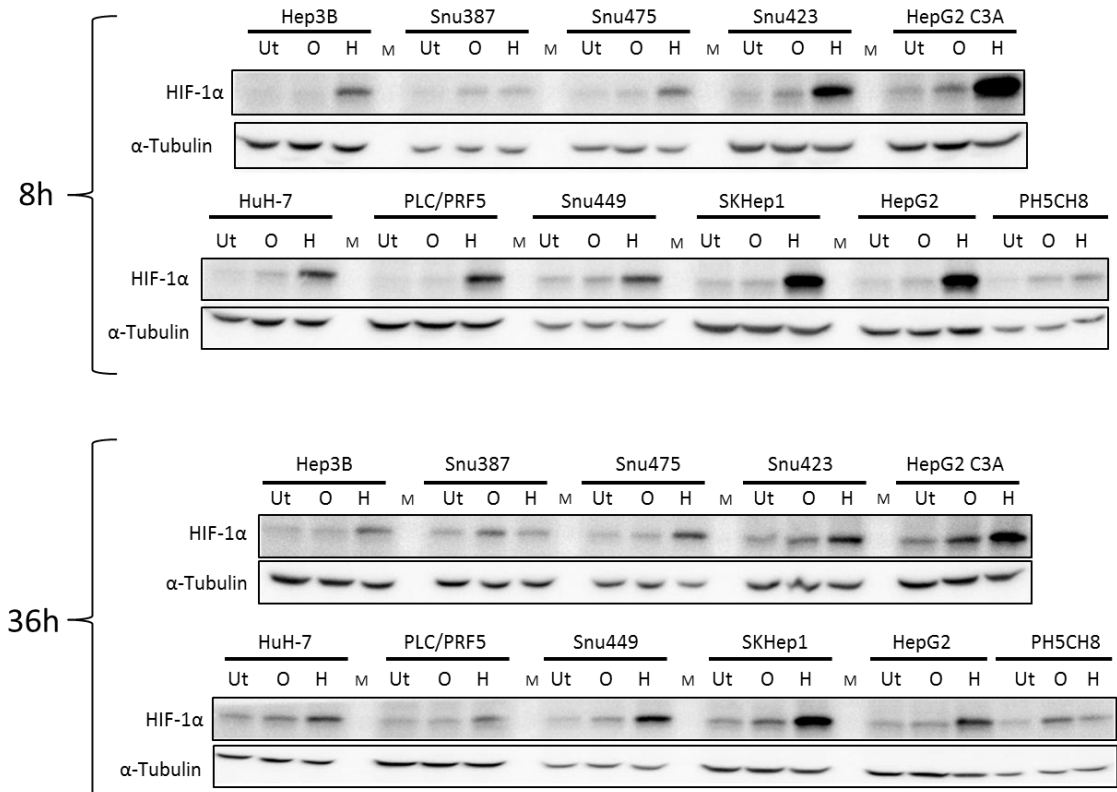

C

OSM compared to normoxia

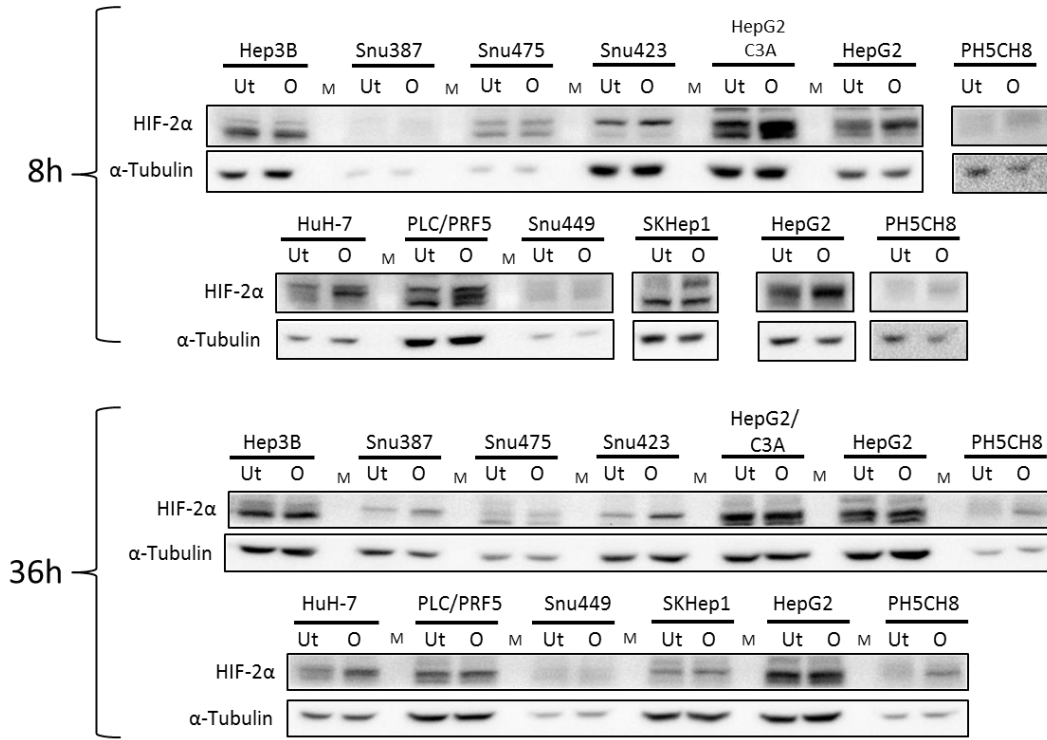

D

OSM compared to hypoxia

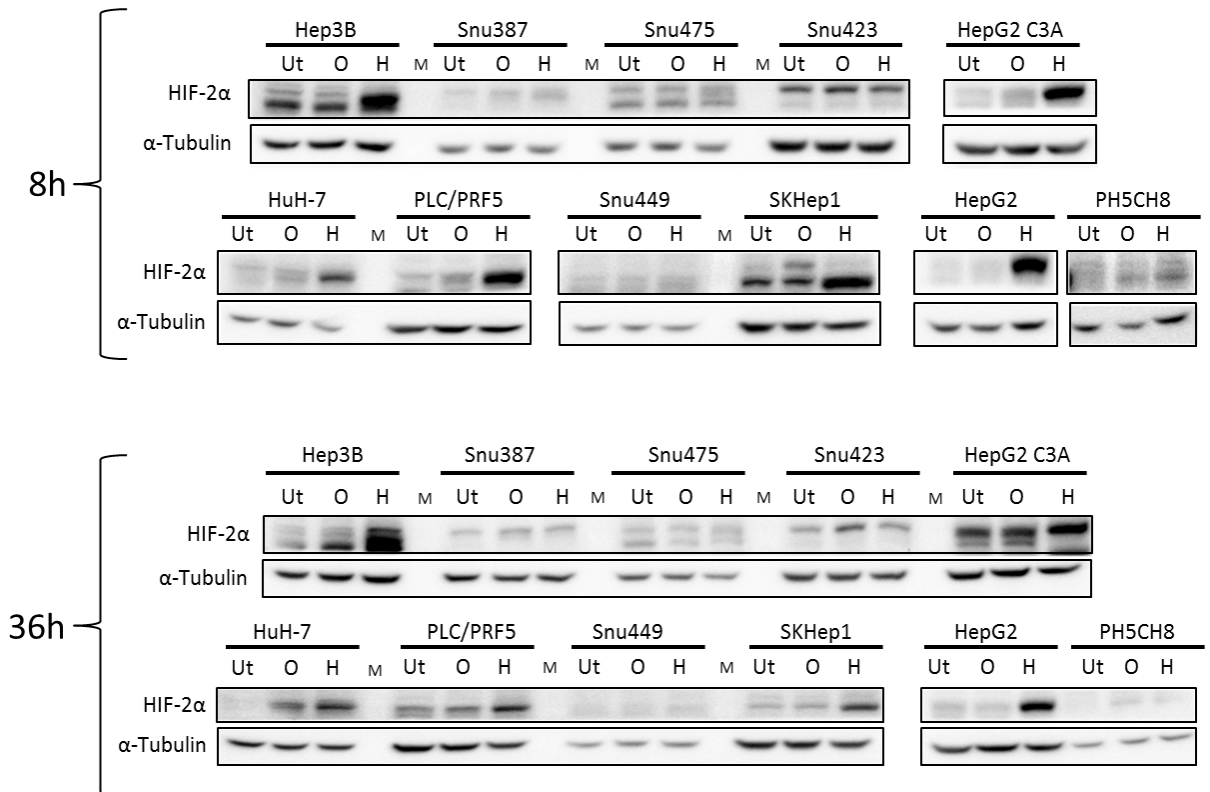

E

THLE-2 – non-neoplastic hepatocytes

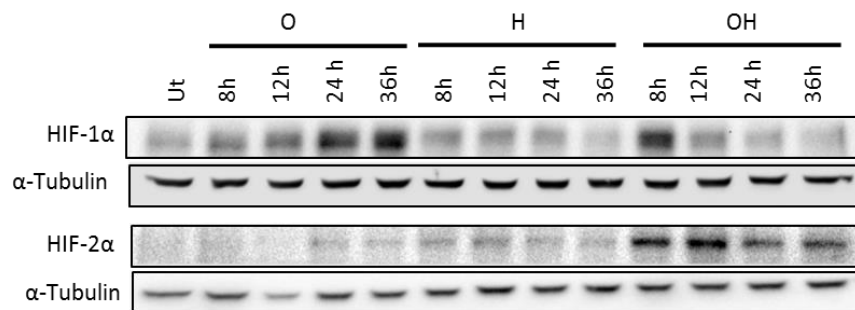

Supplement: 40170_2016_141_MOESM2_ESM.pdf [file 40170_2016_141_MOESM2_ESM.pdf]
