# Supplementary material for: The role of HIF-1 in oncostatin M-dependent metabolic reprogramming of hepatic cells
Source: PubMed Central journal article supplement (PMC4756539; doi:10.1186/s40170-016-0141-0), 2016-02-17

# Additional file 3: Figure S2

## A

### Glucose uptake

### Lactate secretion

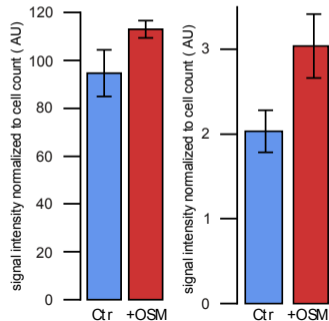

## B

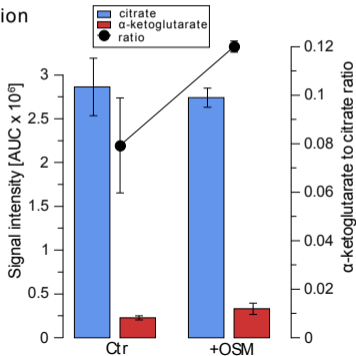

Supplement: 40170_2016_141_MOESM3_ESM.pdf [file 40170_2016_141_MOESM3_ESM.pdf]
