# Supplementary material for: The role of HIF-1 in oncostatin M-dependent metabolic reprogramming of hepatic cells
Source: PubMed Central journal article supplement (PMC4756539; doi:10.1186/s40170-016-0141-0), 2016-02-17
Supplement: 40170_2016_141_MOESM4_ESM.pdf [file 40170_2016_141_MOESM4_ESM.pdf]

## Additional file 4: Table S2.

| Metabolite    |    | Ctr   |                    | Ctr + OSM |                    |
|---------------|----|-------|--------------------|-----------|--------------------|
|               |    | Value | Standard deviation | Value     | Standard deviation |
| Aspartic acid | M0 | 0.86  | 1.74E-003          | 0.90      | 2.24E-004          |
|               | M1 | 0.01  | 6.29E-004          | 0.00      | 1.72E-004          |
|               | M2 | 0.09  | 8.12E-004          | 0.06      | 2.93E-004          |
|               | M3 | 0.04  | 2.68E-004          | 0.04      | 1.79E-005          |
|               | M4 | 0.01  | 1.81E-004          | 0.00      | 6.05E-005          |
| Lactic acid   | M0 | 0.07  | 1.07E-002          | 0.09      | 3.10E-002          |
|               | M1 | 0.00  | 1.67E-004          | 0.00      | 2.36E-004          |
|               | M2 | 0.03  | 3.57E-004          | 0.03      | 1.15E-003          |
|               | M3 | 0.90  | 1.02E-002          | 0.88      | 2.99E-002          |
| Alanine       | M0 | 0.14  | 3.16E-003          | 0.14      | 5.04E-003          |
|               | M1 | 0.01  | 5.72E-005          | 0.00      | 8.85E-005          |
|               | M2 | 0.03  | 4.01E-005          | 0.03      | 4.35E-004          |
|               | M3 | 0.83  | 2.93E-003          | 0.83      | 4.54E-003          |
| Glutamic acid | M0 | 0.85  | 7.89E-003          | 0.89      | 2.05E-003          |
|               | M1 | 0.01  | 3.95E-004          | 0.01      | 1.74E-004          |
|               | M2 | 0.11  | 1.29E-003          | 0.07      | 1.28E-003          |
|               | M3 | 0.01  | 9.13E-005          | 0.01      | 2.53E-004          |
|               | M4 | 0.01  | 1.63E-004          | 0.01      | 2.47E-004          |
| Fumaric acid  | M0 | 0.86  | 9.93E-004          | 0.90      | 2.49E-003          |
|               | M1 | 0.01  | 2.81E-003          | 0.00      | 3.11E-003          |

Continued on next page

## Additional file 4: Table S2. continued from previous page

|                         |    |       |           |       |           |
|-------------------------|----|-------|-----------|-------|-----------|
|                         | M2 | 0.09  | 1.48E-003 | 0.05  | 3.56E-004 |
|                         | M3 | 0.04  | 5.57E-004 | 0.04  | 4.77E-004 |
|                         | M4 | 0.01  | 3.10E-004 | 0.00  | 1.39E-004 |
| $\alpha$ -ketoglutarate | M0 | 0.89  | 1.29E-002 | 0.94  | 3.25E-003 |
|                         | M1 | 0.00  | 3.98E-003 | 0.00  | 1.14E-003 |
|                         | M2 | 0.10  | 1.00E-003 | 0.07  | 2.07E-003 |
|                         | M3 | 0.01  | 1.53E-003 | 0.01  | 3.10E-004 |
|                         | M4 | -0.02 | 2.27E-004 | -0.01 | 2.89E-004 |
|                         | M5 | 0.01  | 1.40E-002 | 0.00  | 3.63E-007 |
| Citric acid             | M0 | 0.31  | 7.77E-003 | 0.46  | 3.45E-003 |
|                         | M1 | 0.02  | 1.93E-004 | 0.01  | 6.22E-004 |
|                         | M2 | 0.52  | 6.93E-003 | 0.40  | 1.14E-003 |
|                         | M3 | 0.02  | 1.41E-003 | 0.02  | 3.61E-004 |
|                         | M4 | 0.09  | 1.03E-003 | 0.07  | 5.86E-004 |
|                         | M5 | 0.04  | 8.40E-004 | 0.04  | 1.39E-004 |
|                         | M6 | 0.01  | 4.13E-004 | 0.01  | 5.87E-004 |

---
