# Supplementary material for: The role of HIF-1 in oncostatin M-dependent metabolic reprogramming of hepatic cells
Source: PubMed Central journal article supplement (PMC4756539; doi:10.1186/s40170-016-0141-0), 2016-02-17
Supplement: 40170_2016_141_MOESM5_ESM.pdf [file 40170_2016_141_MOESM5_ESM.pdf]

## Additional file 5: Table S3.

| Metabolite    |    | Ctr   |                    | Ctr + OSM |                    |
|---------------|----|-------|--------------------|-----------|--------------------|
|               |    | Value | Standard deviation | Value     | Standard deviation |
| Aspartic acid | M0 | 0.05  | 4.78E-004          | 0.06      | 1.20E-003          |
|               | M1 | 0.03  | 1.11E-003          | 0.02      | 7.21E-004          |
|               | M2 | 0.11  | 1.97E-003          | 0.08      | 1.36E-003          |
|               | M3 | 0.18  | 8.73E-004          | 0.25      | 1.09E-003          |
|               | M4 | 0.64  | 2.83E-003          | 0.59      | 4.60E-003          |
| Lactic acid   | M0 | 0.98  | 3.21E-004          | 0.98      | 9.90E-004          |
|               | M1 | 0.00  | 9.15E-005          | 0.00      | 2.90E-004          |
|               | M2 | 0.00  | 1.27E-004          | 0.00      | 1.44E-004          |
|               | M3 | 0.02  | 5.10E-004          | 0.01      | 7.55E-004          |
| Alanine       | M0 | 0.89  | 2.05E-003          | 0.91      | 2.13E-003          |
|               | M1 | 0.00  | 1.19E-004          | 0.00      | 7.62E-004          |
|               | M2 | 0.02  | 9.44E-005          | 0.02      | 3.16E-004          |
|               | M3 | 0.09  | 1.87E-003          | 0.08      | 1.58E-003          |
| Glutamic acid | M0 | 0.00  | 5.98E-004          | 0.00      | 2.98E-005          |
|               | M1 | 0.00  | 7.96E-004          | 0.00      | 1.90E-005          |
|               | M2 | 0.00  | 1.63E-004          | 0.00      | 1.60E-005          |
|               | M3 | 0.00  | 5.86E-005          | 0.00      | 1.02E-004          |
|               | M4 | 0.04  | 1.13E-004          | 0.04      | 2.13E-004          |
|               | M5 | 0.96  | 7.37E-004          | 0.97      | 3.41E-004          |
| Fumaric acid  | M0 | 0.06  | 6.17E-004          | 0.07      | 1.92E-003          |
|               | M1 | 0.02  | 9.40E-004          | 0.02      | 3.30E-004          |

Continued on next page

Additional file 5: Table S3. continued from previous page

|                         |    |      |           |      |           |
|-------------------------|----|------|-----------|------|-----------|
|                         | M2 | 0.10 | 2.70E-003 | 0.08 | 1.36E-003 |
|                         | M3 | 0.18 | 6.00E-004 | 0.25 | 1.40E-003 |
|                         | M4 | 0.64 | 3.02E-003 | 0.59 | 3.24E-003 |
| $\alpha$ -ketoglutarate | M0 | 0.03 | 1.22E-002 | 0.03 | 1.08E-002 |
|                         | M1 | 0.01 | 4.78E-003 | 0.01 | 3.20E-003 |
|                         | M2 | 0.02 | 1.78E-003 | 0.01 | 1.37E-002 |
|                         | M3 | 0.10 | 4.97E-003 | 0.07 | 8.13E-003 |
|                         | M4 | 0.03 | 1.65E-003 | 0.03 | 3.21E-003 |
|                         | M5 | 0.82 | 1.10E-002 | 0.89 | 4.38E-002 |
| Citric acid             | M0 | 0.08 | 3.65E-003 | 0.08 | 2.19E-003 |
|                         | M1 | 0.04 | 1.68E-003 | 0.03 | 4.05E-005 |
|                         | M2 | 0.11 | 3.59E-003 | 0.10 | 1.93E-003 |
|                         | M3 | 0.12 | 1.48E-003 | 0.12 | 1.96E-003 |
|                         | M4 | 0.43 | 6.17E-003 | 0.33 | 2.34E-003 |
|                         | M5 | 0.19 | 1.07E-002 | 0.32 | 4.30E-003 |
|                         | M6 | 0.03 | 1.21E-003 | 0.02 | 7.37E-004 |

---
