# Supplementary material for: The role of HIF-1 in oncostatin M-dependent metabolic reprogramming of hepatic cells
Source: PubMed Central journal article supplement (PMC4756539; doi:10.1186/s40170-016-0141-0), 2016-02-17

# Additional file 6: Figure S3.

A

## PDP2 mRNA - PH5CH1

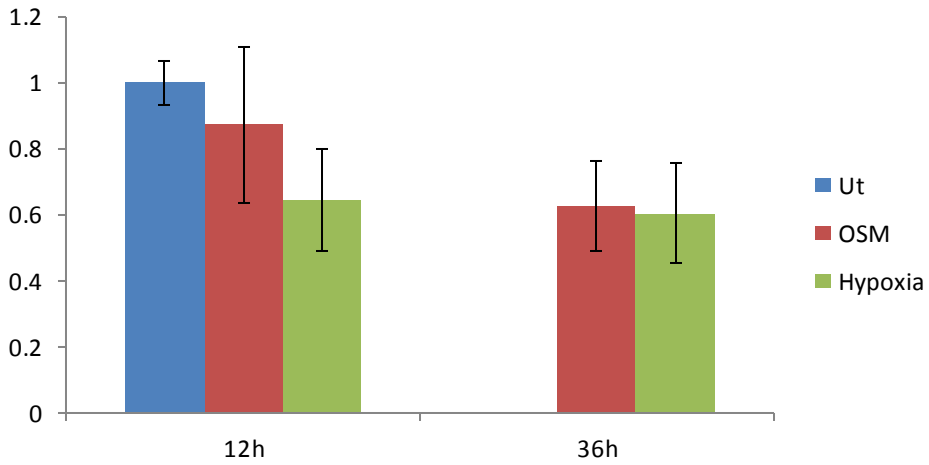

## PDK1 mRNA - PH5CH1

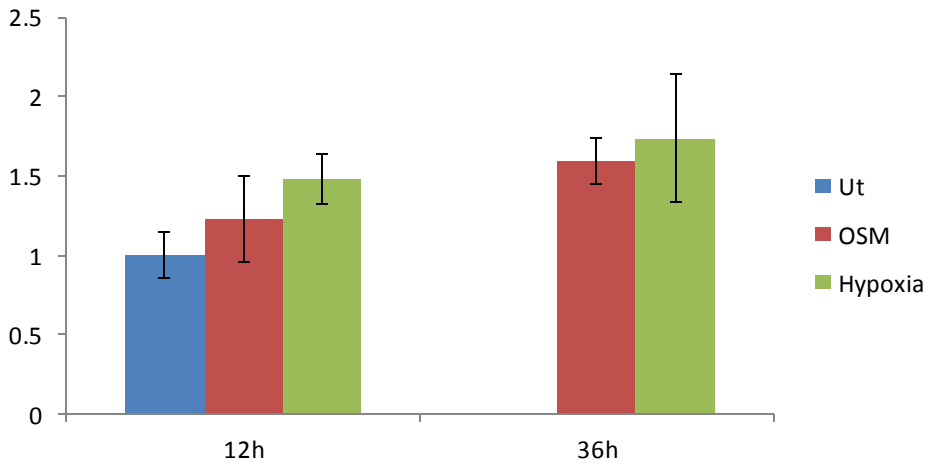

## HIF-1 $\alpha$ mRNA - PH5CH1

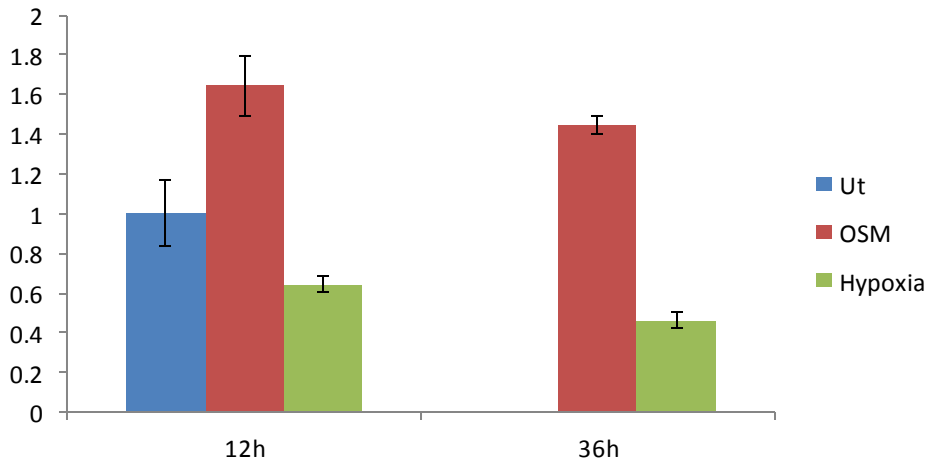

# PH5CH1

**B**

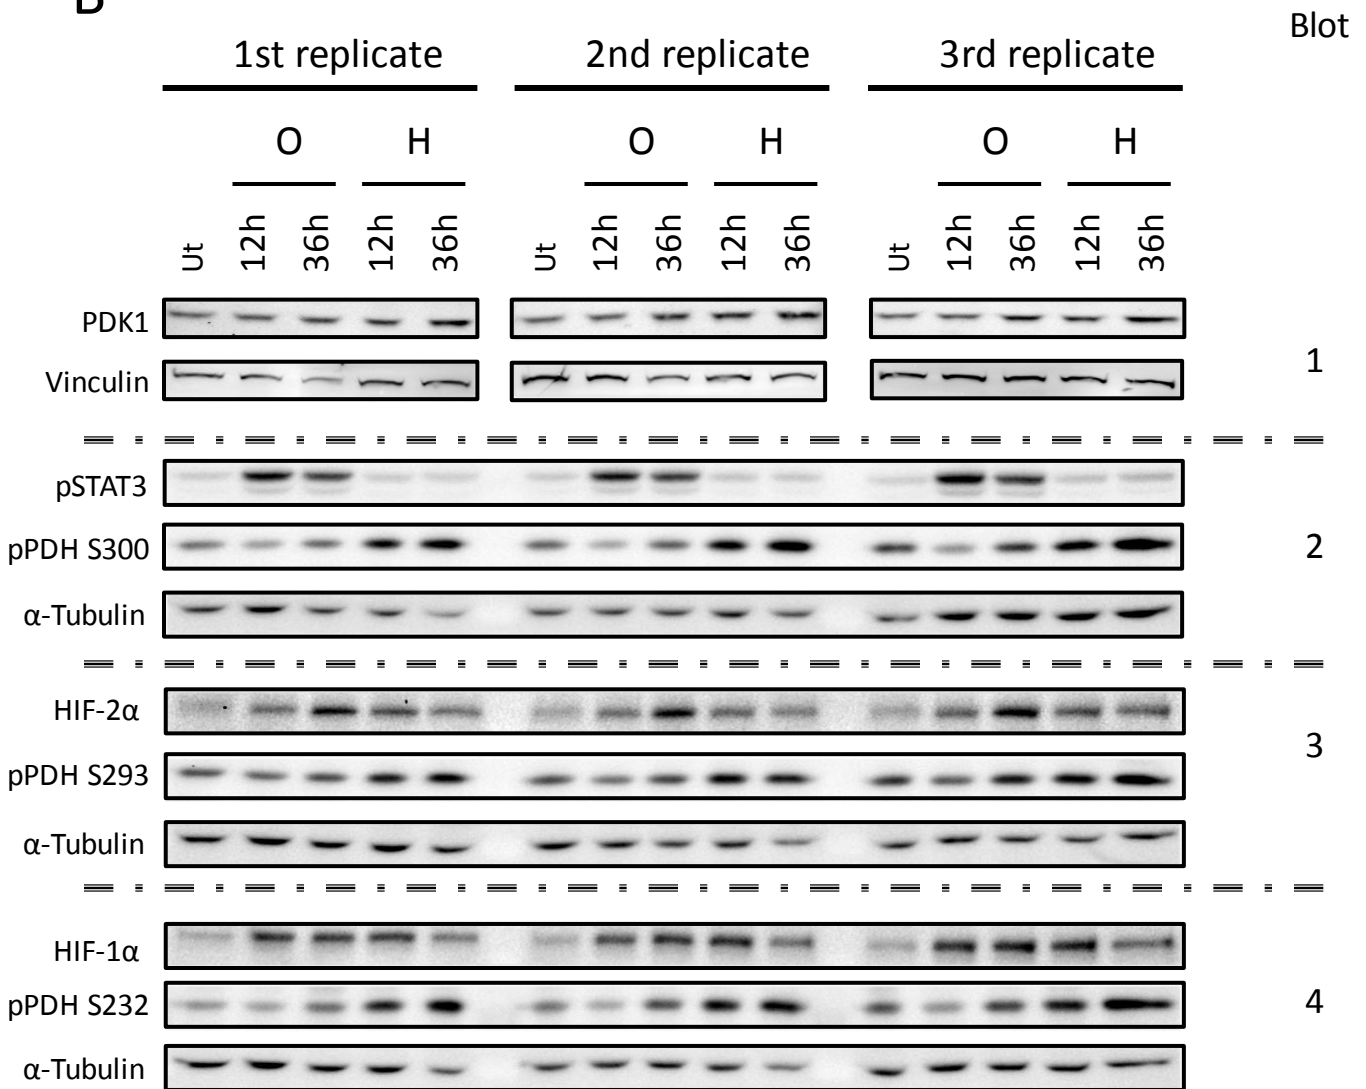

**C**

## PDK1 protein level - PH5CH1

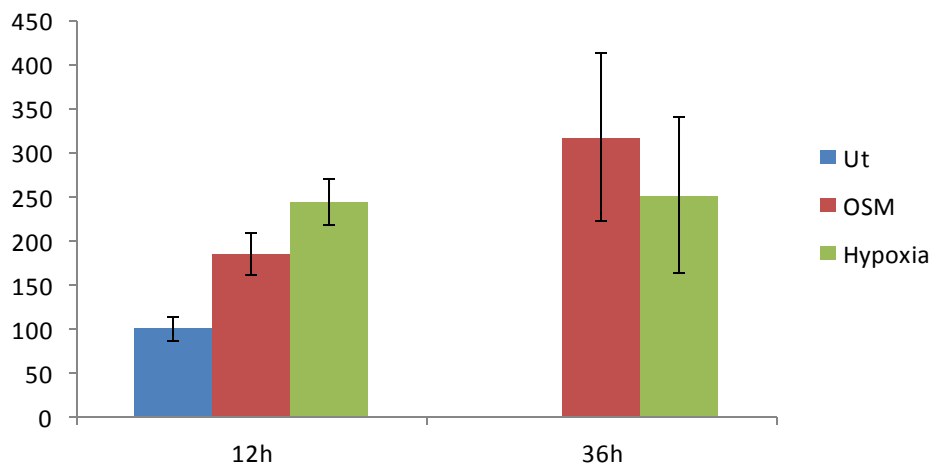

D

### PDP2 mRNA - PH5CH7

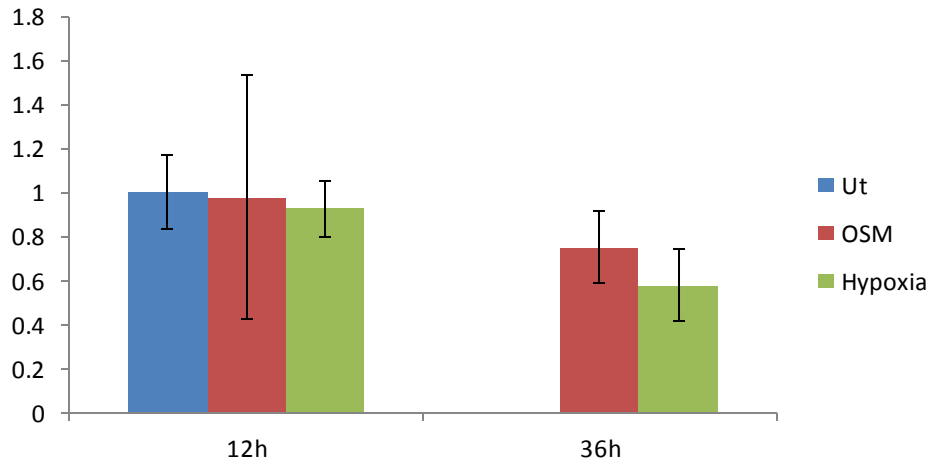

### PDK1 mRNA - PH5CH7

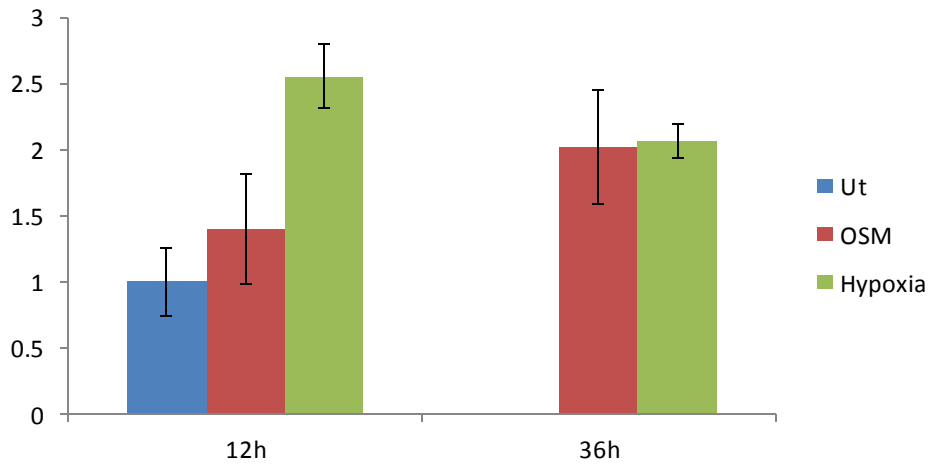

### HIF-1 $\alpha$ mRNA - PH5CH7

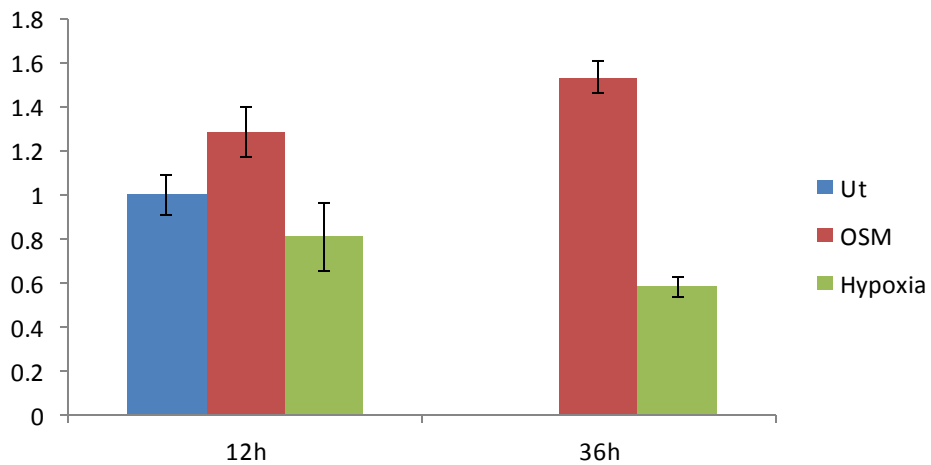

# PH5CH7

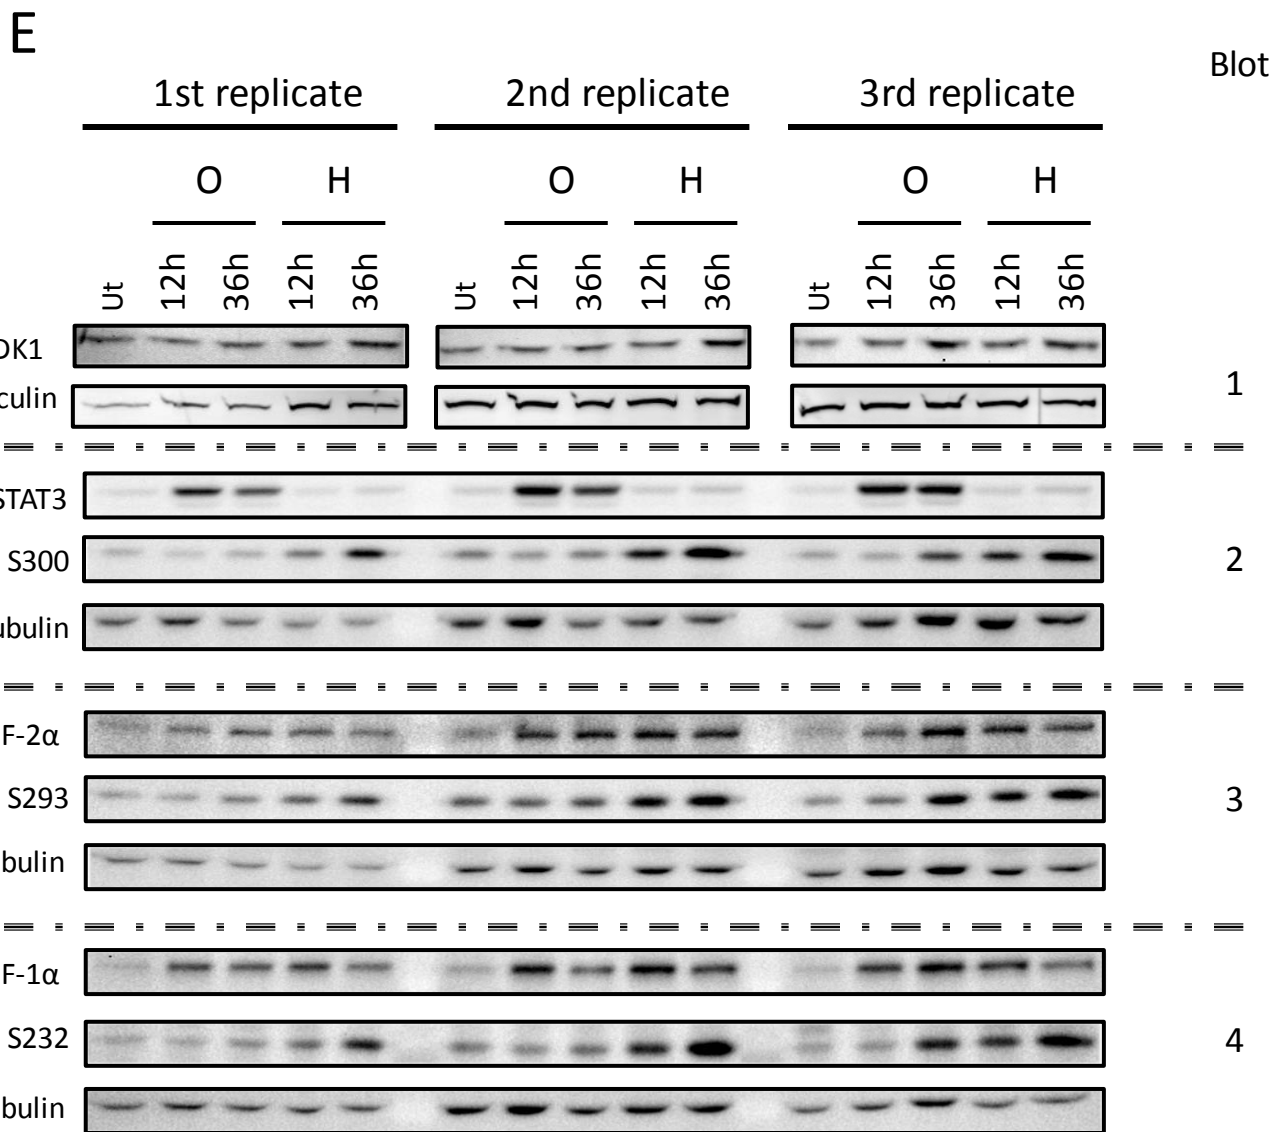

**F**      **PDK1 - Protein level - PH5CH7**

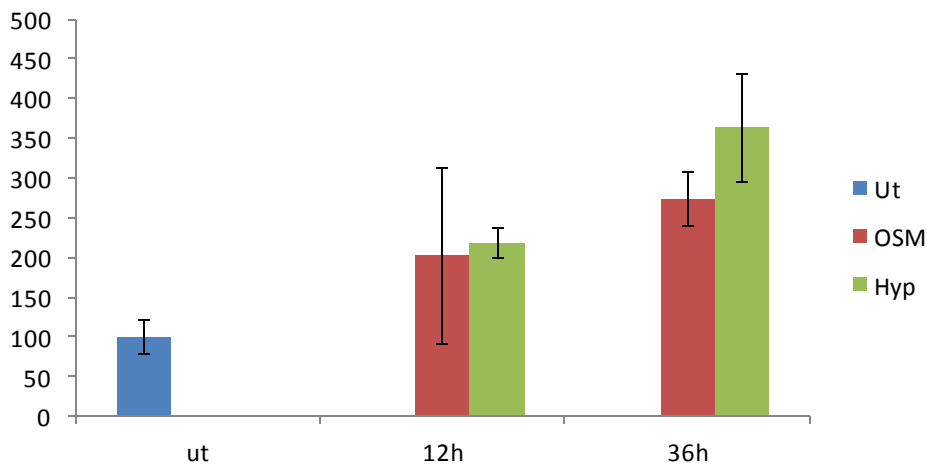

Supplement: 40170_2016_141_MOESM6_ESM.pdf [file 40170_2016_141_MOESM6_ESM.pdf]
